# Supplementary material for: Activation of serpentine for CO2 mineralization by flux extraction of soluble magnesium salts using ammonium sulfate
Source: Royal Society of Chemistry journal article supplement (doi:10.1039/c2ra01347a), 2012-01-01
Supplement: c2ra01347a.pdf [file c2ra01347a.pdf]

# Activation of serpentine for CO<sub>2</sub> mineralization by flux extraction of soluble magnesium salts using ammonium sulphate

James G. Highfield, Hui Qi Lim, Johan Fagerlund, Ron Zevenhoven

## SUPPORTING INFORMATION

Table S1: Glossary of Compounds

| Chemical name                       | Formula                                                                              | Abbrev. | Mineral name    | XRD (ICDD) reference pattern |
|-------------------------------------|--------------------------------------------------------------------------------------|---------|-----------------|------------------------------|
| Ammonium sulphate                   | (NH <sub>4</sub> ) <sub>2</sub> SO <sub>4</sub>                                      | AS      | Mascagnite      | 00-040-0660                  |
| Serpentinite (class)                | (Mg,Al) <sub>3</sub> [(Si,Fe) <sub>2</sub> O <sub>3</sub> ](OH) <sub>4</sub>         | L       | Lizardite       | 00-050-1625                  |
| Ammonium bisulphate                 | NH <sub>4</sub> HSO <sub>4</sub>                                                     | ABS     | —               | —                            |
| Sulphamic acid                      | NH <sub>3</sub> SO <sub>3</sub>                                                      | SA      | —               | —                            |
| Ammonium pyrosulphate               | (NH <sub>4</sub> ) <sub>2</sub> S <sub>2</sub> O <sub>7</sub>                        | APS     | —               | —                            |
| Ammonium magnesium sulphate hydrate | (NH <sub>4</sub> ) <sub>2</sub> Mg(SO <sub>4</sub> ) <sub>2</sub> •6H <sub>2</sub> O | B       | Boussingaultite | 00-035-0771                  |
| Ammonium magnesium sulphate         | (NH <sub>4</sub> ) <sub>2</sub> Mg <sub>2</sub> (SO <sub>4</sub> ) <sub>3</sub>      | E       | Efremovite      | 00-042-1432                  |
| Magnesium sulphate heptahydrate     | MgSO <sub>4</sub> •7H <sub>2</sub> O                                                 | EP      | Epsomite        | 01-072-0696                  |
| Magnesium oxide                     | MgO                                                                                  | —       | Periclase       | 00-004-0829                  |
| Silica                              | SiO <sub>2</sub>                                                                     | —       | EU-20           | 00-043-0745                  |

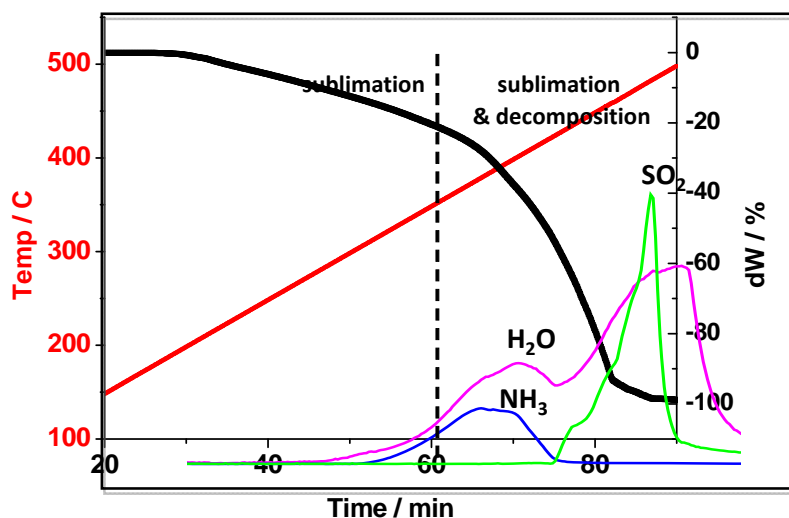

Fig. S2 TG-FTIR: Sulphamic acid in dry air flow ramped to 500 °C

| <u>T</u><br>(°C)    | <u>dW</u><br>(%) | <u>Likely Process</u>        | <u>FTIR</u><br>(EGA)                                    | <u>Progressive reaction(s)</u>                                                                                                                                                                                                                                                                                                                                                        |
|---------------------|------------------|------------------------------|---------------------------------------------------------|---------------------------------------------------------------------------------------------------------------------------------------------------------------------------------------------------------------------------------------------------------------------------------------------------------------------------------------------------------------------------------------|
| ≤ 300               | 26               |                              | NH <sub>3</sub> , H <sub>2</sub> O                      | A: (NH <sub>4</sub> ) <sub>2</sub> SO <sub>4</sub> → NH <sub>4</sub> HSO <sub>4</sub> + NH <sub>3</sub> (dW = 12.9%)<br>(NH <sub>4</sub> ) <sub>2</sub> SO <sub>4</sub> → NH <sub>3</sub> SO <sub>3</sub> + NH <sub>3</sub> + H <sub>2</sub> O (dW = 26.5%)<br>B: NH <sub>4</sub> HSO <sub>4</sub> → NH <sub>3</sub> SO <sub>3</sub> + H <sub>2</sub> O (dW = 15.7%)                  |
| 300<br>to<br>350    | 15.5<br><br>7.0  |                              | NH <sub>3</sub> , H <sub>2</sub> O                      | B: 2NH <sub>4</sub> HSO <sub>4</sub> → 2NH <sub>3</sub> SO <sub>3</sub> + 2H <sub>2</sub> O (dW = 15.7%)<br>C: (NH <sub>4</sub> ) <sub>2</sub> S <sub>2</sub> O <sub>7</sub> ↔ 2NH <sub>3</sub> SO <sub>3</sub> + H <sub>2</sub> O (dW = 8.7%)<br>D: 2NH <sub>4</sub> HSO <sub>4</sub> ↔ (NH <sub>4</sub> ) <sub>2</sub> S <sub>2</sub> O <sub>7</sub> + H <sub>2</sub> O (dW = 7.8%) |
| > 350<br>400<br>450 | <br>~70<br>100   | sublimation<br>decomposition | SO <sub>2</sub> , N <sub>2</sub> O,<br>H <sub>2</sub> O | D: 2NH <sub>3</sub> SO <sub>3</sub> → 2SO <sub>2</sub> + 2NH <sub>2</sub> OH<br>E: 2NH <sub>2</sub> OH → N <sub>2</sub> O (+ H <sub>2</sub> O + 2H <sub>2</sub> ?)                                                                                                                                                                                                                    |

Fig. S3 Scheme of processes in ammonium sulphate thermolysis up to 450 °C in air.

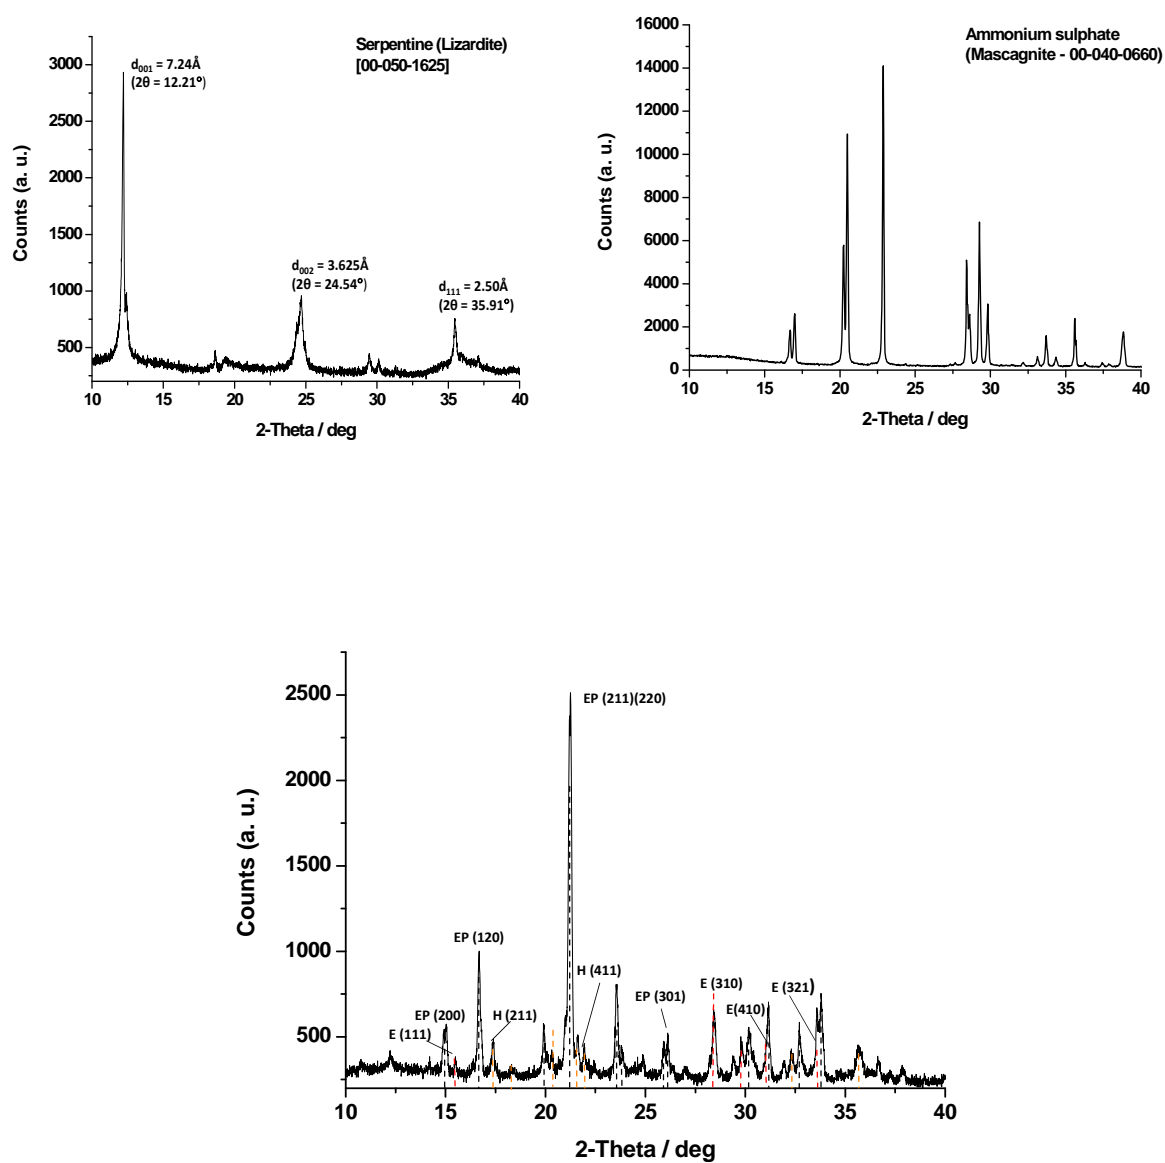

**Fig S4** XRD patterns for reactants Lizardite, ammonium sulphate (Aldrich >99%), and the product from heating a 1/3 mol/mol mixture in dry air at 400 °C for 1 hour [EP = Epsomite (black), E = Efremovite (red), H = Hexahydrite (orange)].

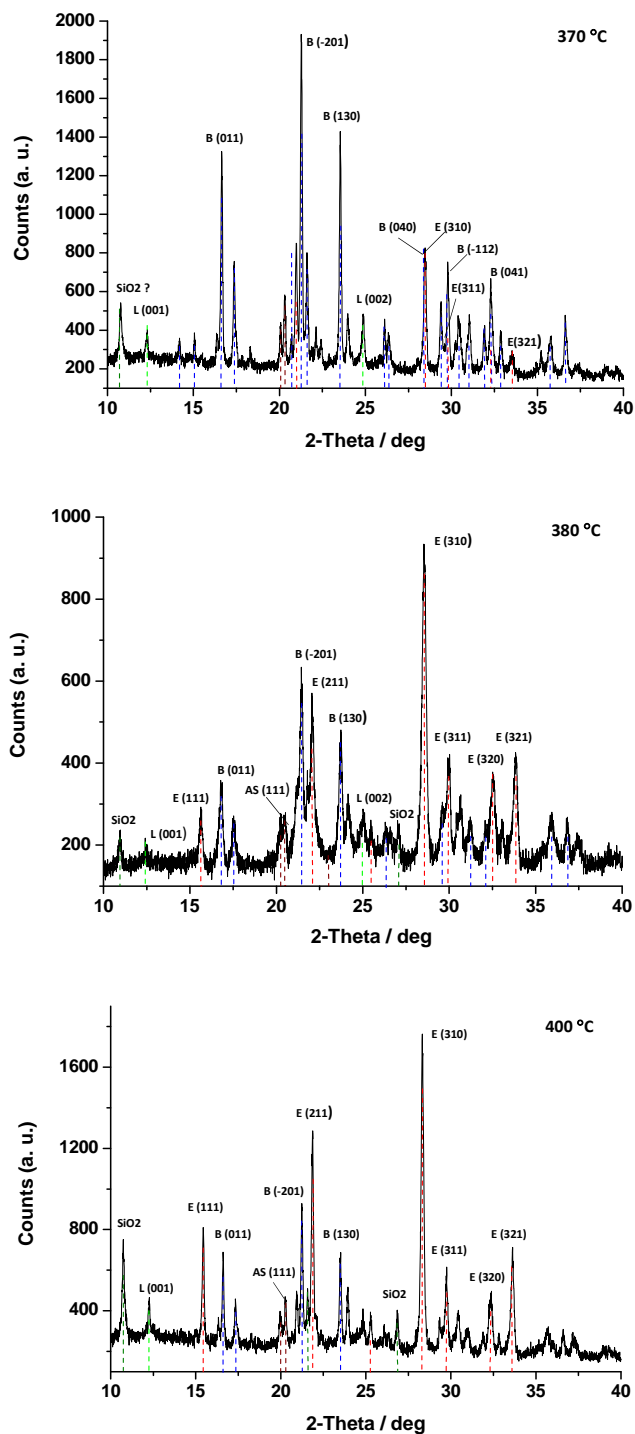

**Fig S5** XRD of products from Lizardite/ammonium sulphate mixtures (1/4.5 mol/mol) held for 1 hour at 370, 380, and 400 °C [B = Boussingaultite (blue), E = Efremovite (red), L = Lizardite (green), AS = ammonium sulphate (brown)]

| <b>T</b><br>(°C) | <b>dW</b><br>(%) | <b>Product phase(s)</b><br>(XRD)                                                                                                                         | <b>FTIR</b><br>(EGA)              | <b>Progressive reaction(s)</b>                                                                                                                                                                  |
|------------------|------------------|----------------------------------------------------------------------------------------------------------------------------------------------------------|-----------------------------------|-------------------------------------------------------------------------------------------------------------------------------------------------------------------------------------------------|
| 300              | 25               | $(\text{NH}_4)_2\text{Mg}(\text{SO}_4)_2 \cdot 6\text{H}_2\text{O}$<br>[ <i>Boussingaultite</i> : #35-0771]                                              | $\text{NH}_3, \text{H}_2\text{O}$ | <b>A:</b> $2(\text{NH}_4)_2\text{SO}_4 + \text{MgO} \rightarrow (\text{NH}_4)_2\text{Mg}(\text{SO}_4)_2 + 2\text{NH}_3 + \text{H}_2\text{O}$                                                    |
| 350              | 30               | $(\text{NH}_4)_2\text{Mg}(\text{SO}_4)_2 \cdot 6\text{H}_2\text{O}$<br>&<br>$(\text{NH}_4)_2\text{Mg}_2(\text{SO}_4)_3$<br>[ <i>Efremovite</i> #42-1432] | $\text{NH}_3, \text{H}_2\text{O}$ | <b>B:</b> $(\text{NH}_4)_2\text{Mg}(\text{SO}_4)_2 + (\text{NH}_4)_2\text{SO}_4 + \text{MgO} \rightarrow (\text{NH}_4)_2\text{Mg}_2(\text{SO}_4)_3 + 2\text{NH}_3 + \text{H}_2\text{O}$         |
| 400              | 40               | $(\text{NH}_4)_2\text{Mg}_2(\text{SO}_4)_3$<br>&<br>$\text{MgSO}_4 \cdot 7\text{H}_2\text{O}$<br>[ <i>Epsomite</i> #1-072-0696]                          | $\text{NH}_3, \text{H}_2\text{O}$ | <b>C:</b> $(\text{NH}_4)_2\text{Mg}_2(\text{SO}_4)_3 + \text{MgO} \rightarrow 3\text{MgSO}_4 + 2\text{NH}_3 + \text{H}_2\text{O}$                                                               |
| ----             | ----             | -----                                                                                                                                                    | -----                             | $3(\text{NH}_4)_2\text{SO}_4 + 3\text{MgO} \rightarrow 3\text{MgSO}_4 + 6\text{NH}_3 + 3\text{H}_2\text{O}$                                                                                     |
| 450              | >55              | $\text{MgSO}_4 \cdot n\text{H}_2\text{O}$                                                                                                                | $\text{NH}_3, \text{H}_2\text{O}$ | <b>A+B+C:</b>                                                                                                                                                                                   |
| 500              | >55              | (n=5-6)                                                                                                                                                  | $\text{SO}_2, \text{N}_2\text{O}$ | <b>D:</b> $2\text{NH}_3\text{SO}_3 \rightarrow 2\text{SO}_2 + 2\text{NH}_2\text{OH}$<br><b>E:</b> $2\text{NH}_2\text{OH} \rightarrow \text{N}_2\text{O} (+ \text{H}_2\text{O} + 2\text{H}_2 ?)$ |

**Fig. S6** Formation and interconversion of ammonium/magnesium (Tutton salt) intermediates leading to hydrated  $\text{MgSO}_4$  from Lizardite/ammonium sulphate at increasing temperature [reaction scheme based on  $\text{MgO}$  for simplicity].
